# Supplementary material for: Magnetically separable titanium-silicate mesoporous materials with core–shell morphology: synthesis, characterization and catalytic properties
Source: Royal Society of Chemistry journal article supplement (doi:10.1039/b911381a), 2009-01-01
Supplement: b911381a.pdf [file b911381a.pdf]

## Supplementary Information

### **Magnetically separable titanium-silicate mesoporous materials with core-shell morphology: synthesis, characterization and catalytic properties**

**Marina V. Barmatova,<sup>\*</sup> Irina D. Ivanchikova, Oxana A. Kholdeeva, Vladimir I. Zaikovskii, Alexander N. Shmakov, Maxim S. Mel'gunov**

*Boriskov Institute of Catalysis, 5 Acad. Lavrentiev ave., Novosibirsk, Russia. E-mail:*

[marybar@catalysis.ru](mailto:marybar@catalysis.ru)

**Table S1** XRD data for magnetite, maghemite and synthesized iron oxide NPs

**Figure S1** Illustration of the magnetic separation of Ti-SMCMS.

**Table S1** XRD data for magnetite, mahgemite and synthesized iron oxide NPs

| Crystalline plane (hkl) | Table data-d (A) for magnetite | Table data-d (A) for mahgemite | XRD results-2 $\theta$ | XRD results-d (A) |
|-------------------------|--------------------------------|--------------------------------|------------------------|-------------------|
| (111)                   | 4.85                           | 4.82                           | 18.3                   | 4.84              |
| (220)                   | 2.97                           | 2.95                           | 30.2                   | 2.95              |
| (311)                   | 2.53                           | 2.51                           | 35.5                   | 2.52              |
| (400)                   | 2.10                           | 2.09                           | 43.2                   | 2.09              |
| (422)                   | 1.71                           | 1.70                           | 53.6                   | 1.70              |
| (511)                   | 1.62                           | 1.61                           | 57.2                   | 1.61              |
| (440)                   | 1.48                           | 1.47                           | 62.8                   | 1.48              |

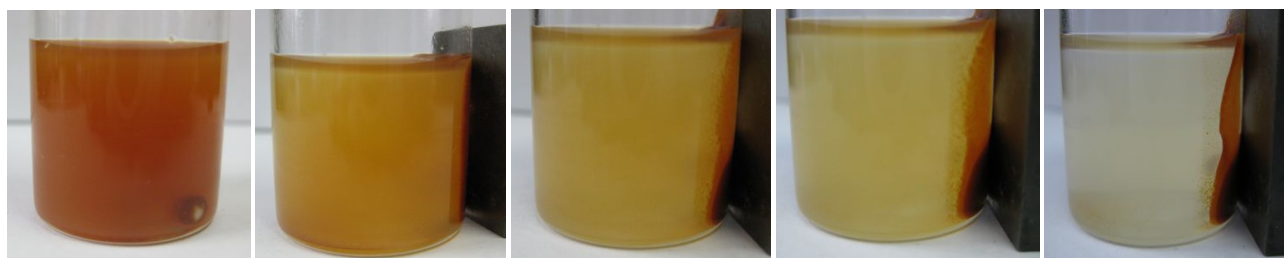

**Figure S1**
